# Supplementary material for: Synthesis and degradation study of graft copolymers of poly(limonene carbonate)
Source: Royal Society of Chemistry journal article supplement (doi:10.1039/d3py00932g), 2023-01-01
Supplement: d3py00932g1.pdf [file d3py00932g1.pdf]

Supporting Information for

**Synthesis and Degradation study of Graft Copolymers of Poly (limonene carbonate)**

Dipannita Ghosh<sup>1</sup>, Seema Agarwal<sup>1,2\*</sup>

<sup>1</sup>Macromolecular Chemistry II, University of Bayreuth, Universitätsstraße 30, 95440 Bayreuth, Germany

<sup>2</sup>Macromolecular Chemistry II, Bavarian Polymer Institute, University of Bayreuth, Universitätsstraße 30, 95440 Bayreuth, Germany

\* Corresponding author

Seema Agarwal, Macromolecular Chemistry II, Bavarian Polymer Institute, University of Bayreuth, Universitätsstraße 30, 95440 Bayreuth, Germany, [agarwal@uni-bayreuth.de](mailto:agarwal@uni-bayreuth.de)

**Table S1. Graft Copolymerization of  $\epsilon$ -caprolactone onto PLimC backbone**

| Sample name         | Feed ratio<br>(PLimC:<br>PCL)<br>Molar ratio | Copolymer<br>composition<br>(PLimC: PCL)<br>Molar ratio | Yield<br>(%) | $M_p$<br>(g mol <sup>-1</sup> ) | $\bar{D}^a$ | Grafting<br>density<br>(%) | $T_{5\%}^b$<br>(°C) |
|---------------------|----------------------------------------------|---------------------------------------------------------|--------------|---------------------------------|-------------|----------------------------|---------------------|
| PLimC-g-PCL (1:0.5) | 1:0.5                                        | 1:0.3                                                   | 81           | 102353                          | 1.29        | 100                        | 226                 |
| PLimC-g-PCL (1:2)   | 1:2                                          | 1:1                                                     | 72           | 141383                          | 1.29        | 100                        | 248                 |
| PLimC-g-PCL (1:10)  | 1:10                                         | 1:4.4                                                   | 80           | 238225                          | 1.28        | 100                        | 277                 |

<sup>a</sup> Determined by THF-GPC; <sup>b</sup> Determined at a heating rate of 10 K min<sup>-1</sup> under N<sub>2</sub> atmosphere from TGA.

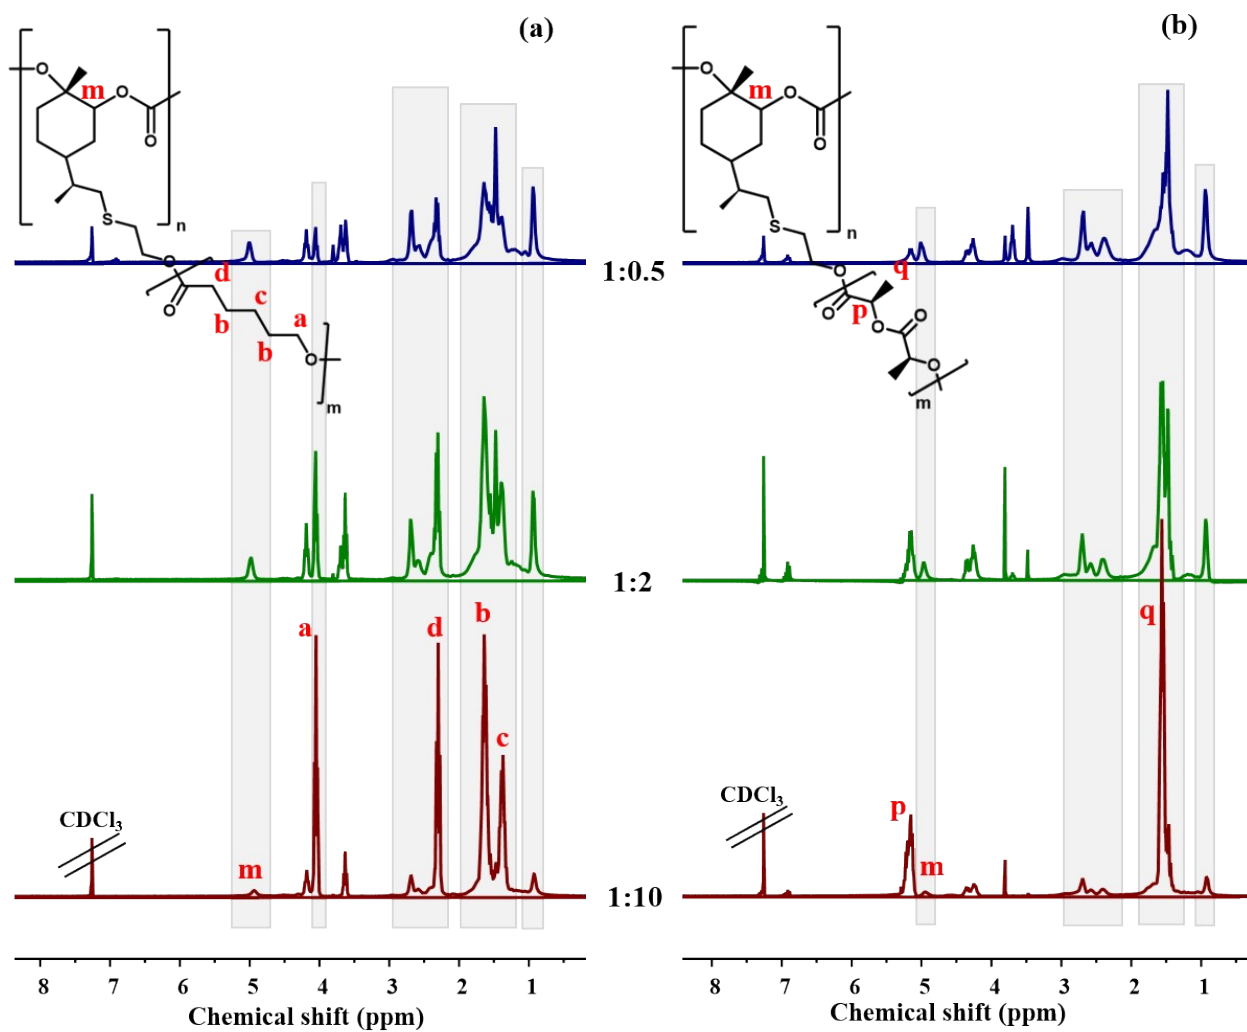

**Figure S1.**  $^1\text{H}$  NMR of graft copolymers (a) PLimC-g-PCL and (b) PLimC-g-PDLLA with different feed ratios measured in  $\text{CDCl}_3$ .

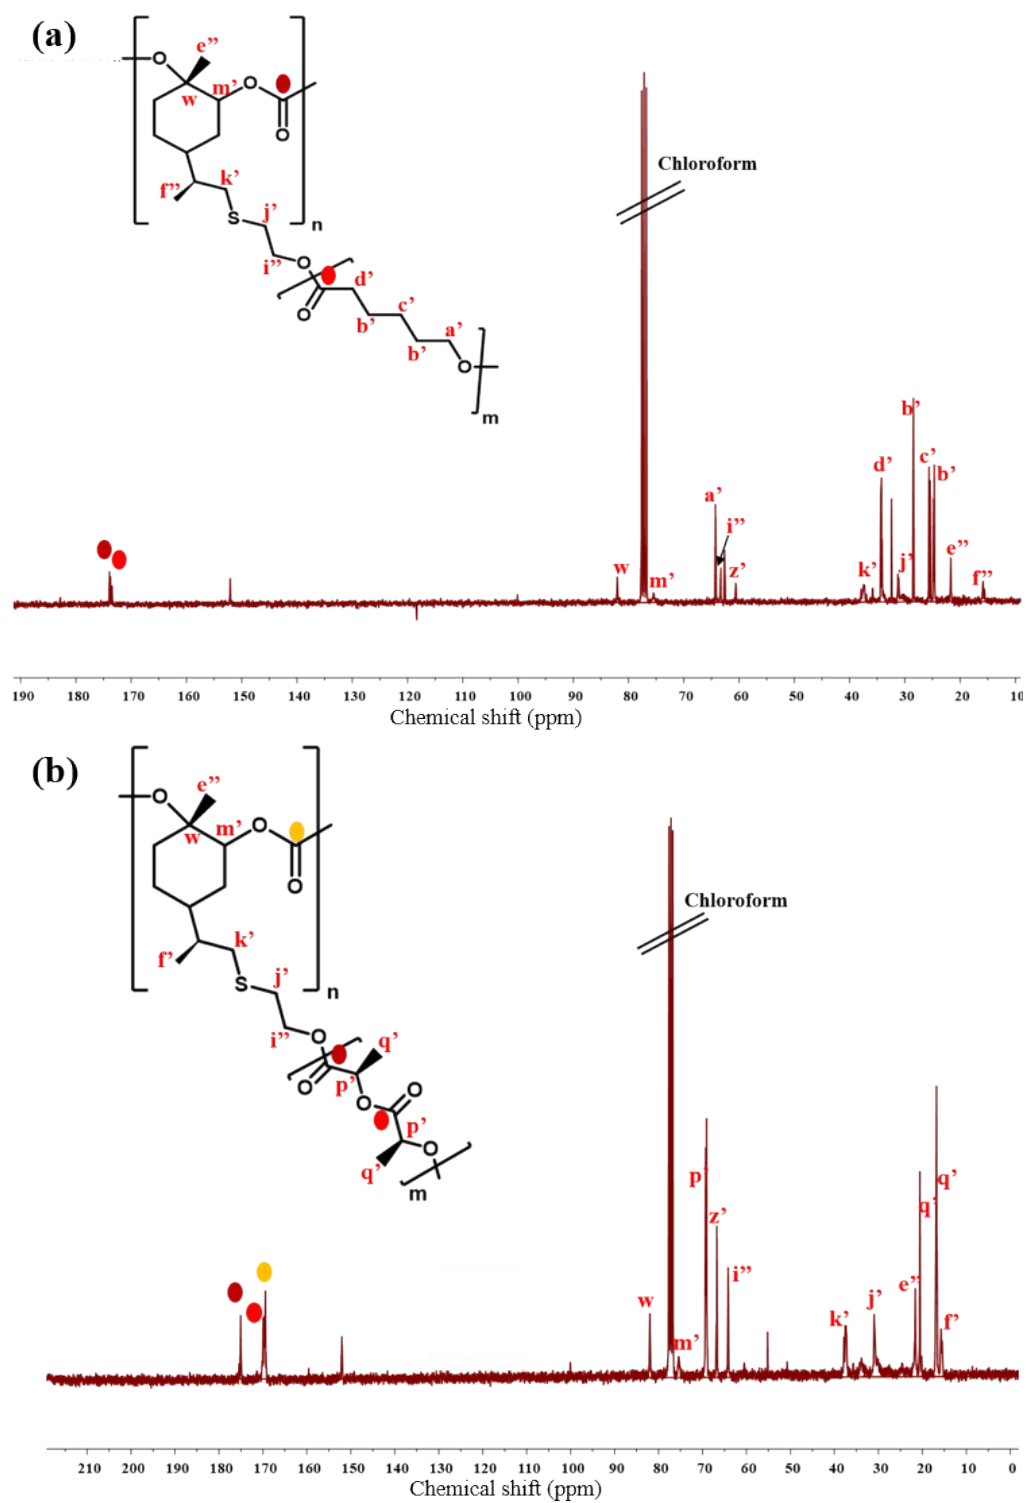

**Figure S2.**  $^{13}\text{C}\{^1\text{H}\}$  NMR of graft copolymers (a) PLimC-g-PCL and (b) PLimC-g-PDLLA with different feed ratios measured in  $\text{CDCl}_3$ .

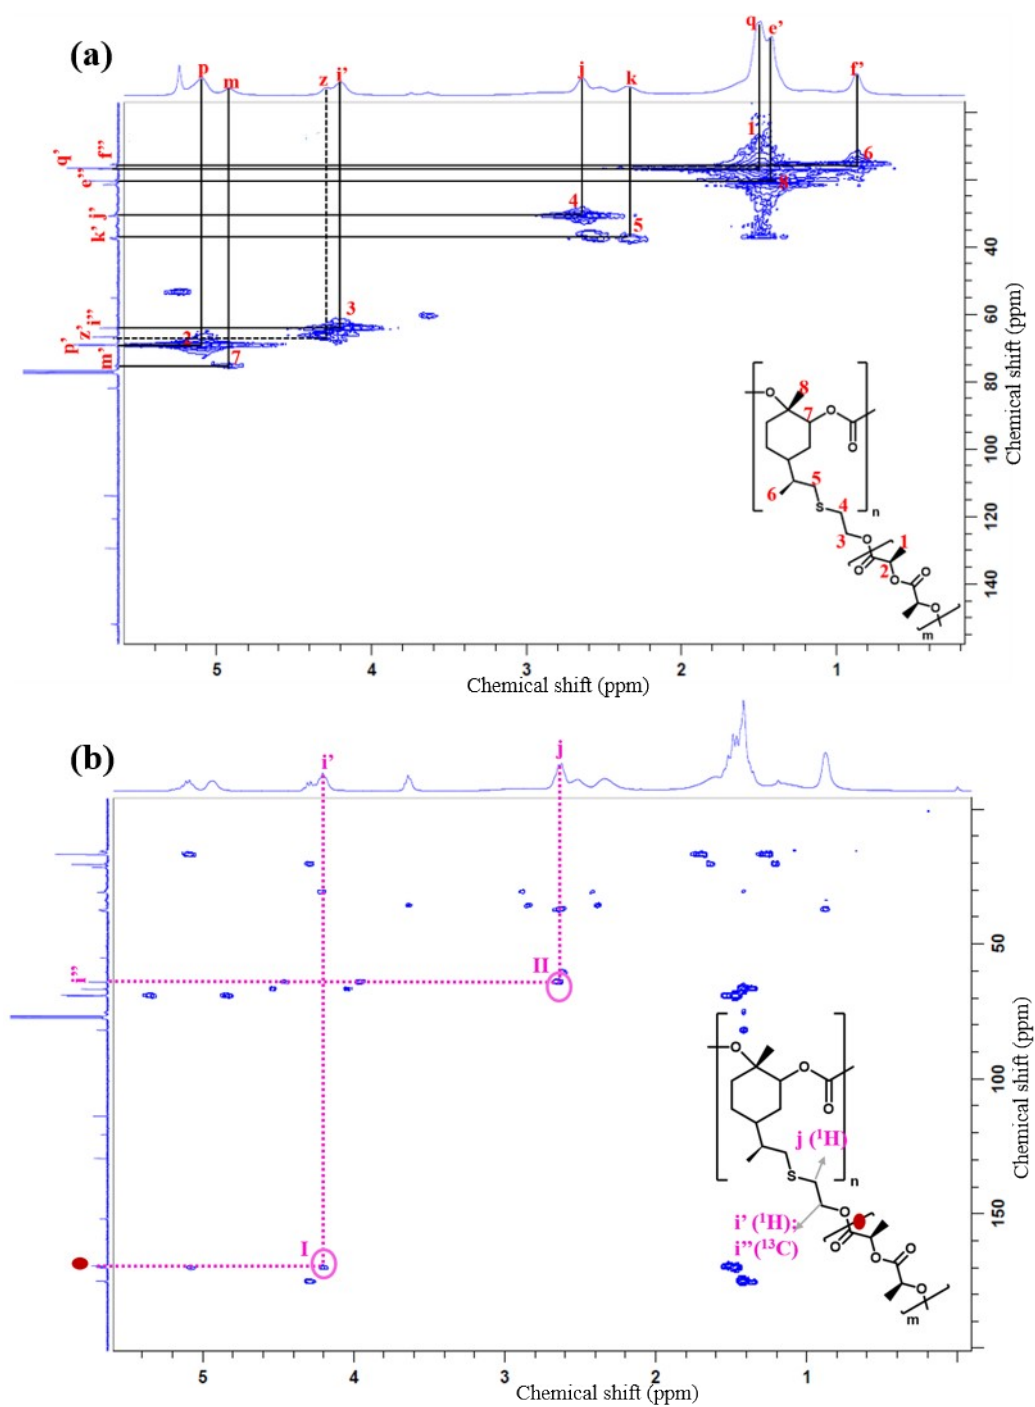

**Figure S3.** (a) HMQC NMR spectra and (b) HMBC NMR spectra of PLimC-g-PDLLA with feed ratio 1:2 measured in  $\text{CDCl}_3$

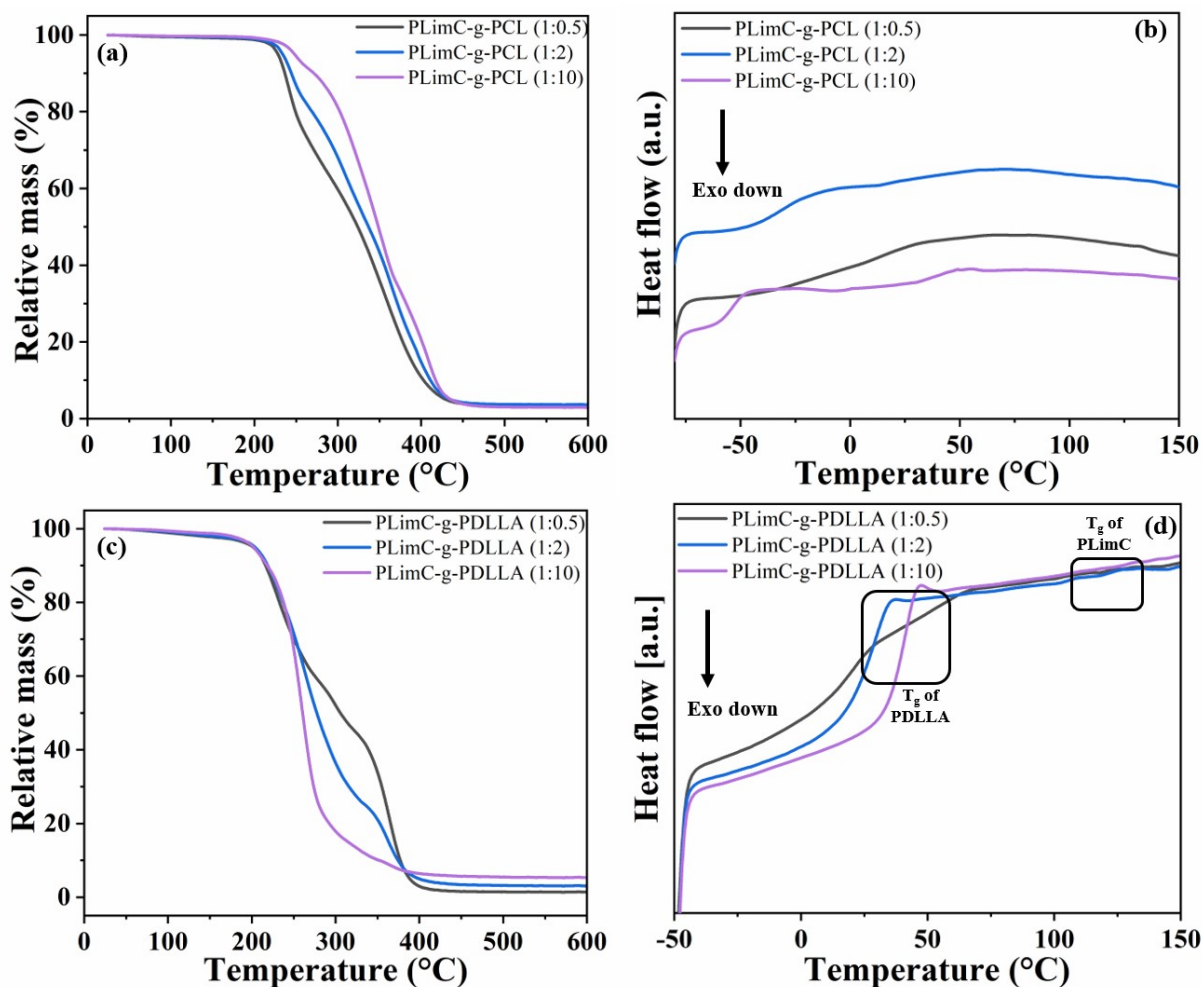

**Figure S4.** TGA thermograms of (a) PLimC-g-PCL and (c) PLimC-g-PDLLA with different feed ratios measured under nitrogen with 10 K min<sup>-1</sup>. DSC thermograms (2<sup>nd</sup> heating curve) of (b) PLimC-g-PCL and (d) PLimC-g-PDLLA with different feed ratios measured under nitrogen with 10 K min<sup>-1</sup>.

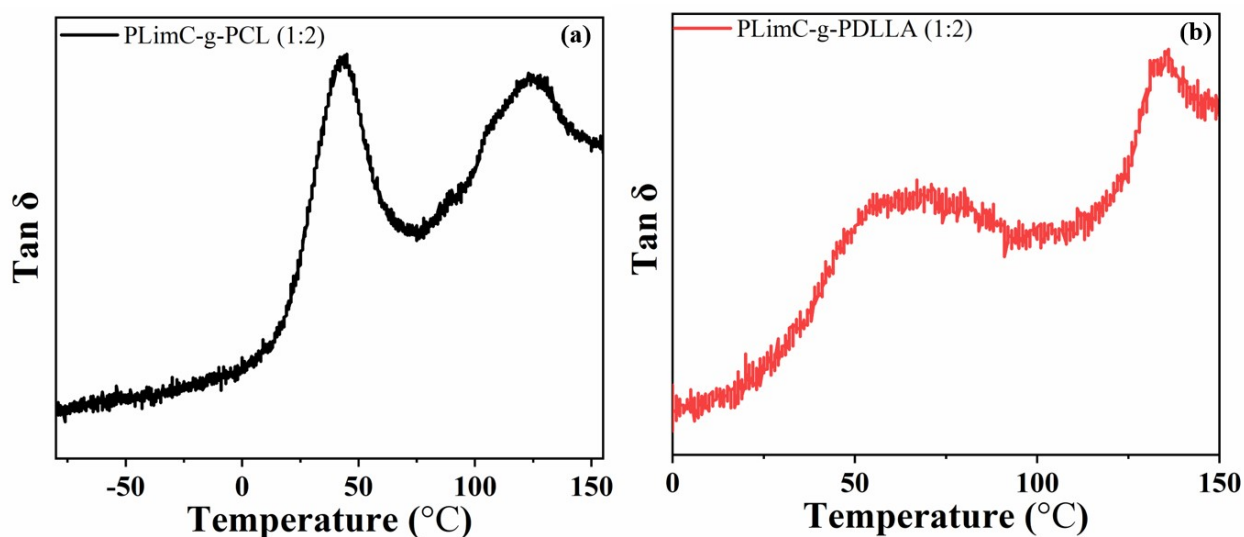

**Figure S5.** DMA curves measured for graft copolymers (a) PLimC-g-PCL (b) PLimC-g-PDLLA in the temperature range of -100 °C to 160 °C.

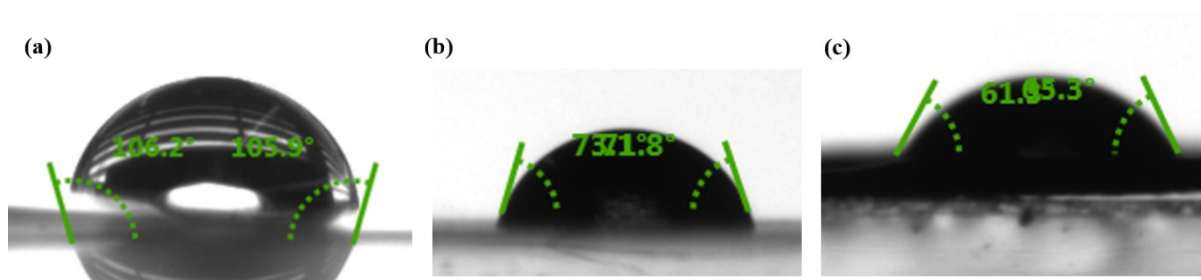

**Figure S6.** Contact angle measurement of (a) pure PLimC, (b) pure PDLLA and (c) pure PCL

**Table S2. Mechanical properties of PLimC-g-PDLLA and PLimC-g-PCL**

| Sample name           | Ultimate tensile <sup>a</sup> strength (MPa) | Elongation at break <sup>a</sup> (%) |
|-----------------------|----------------------------------------------|--------------------------------------|
| Pure PLimC            | 38 ± 4                                       | 5 ± 2                                |
| Pure PCL              | 26 ± 1                                       | 403 ± 3                              |
| Pure PDLLA            | 68 ± 1                                       | 4 ± 1                                |
| PLimC-g-PDLLA (1:0.5) | 12 ± 0.5                                     | 3 ± 2                                |
| PLimC-g-PDLLA (1:2)   | 17 ± 0.1                                     | 3 ± 1                                |
| PLimC-g-PDLLA (1:10)  | 9 ± 0.5                                      | 5 ± 2                                |
| PLimC-g-PCL (1:0.5)   | 15 ± 0.5                                     | 87 ± 11                              |
| PLimC-g-PCL (1:2)     | 16 ± 0.5                                     | 102 ± 9                              |
| PLimC-g-PCL (1:10)    | 15 ± 1                                       | 114 ± 12                             |

<sup>a</sup>Measurement done at 10 mm. min<sup>-1</sup> test speed.

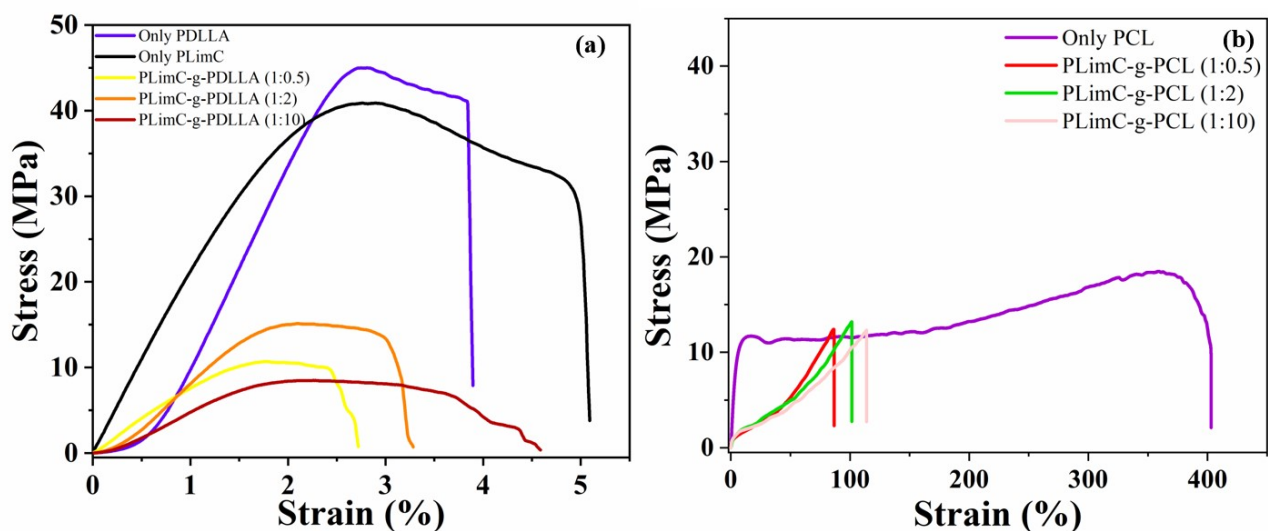

**Figure S7.** Stress-strain curves of PLimC-g-PDLLA and PLimC-g-PCL graft copolymers

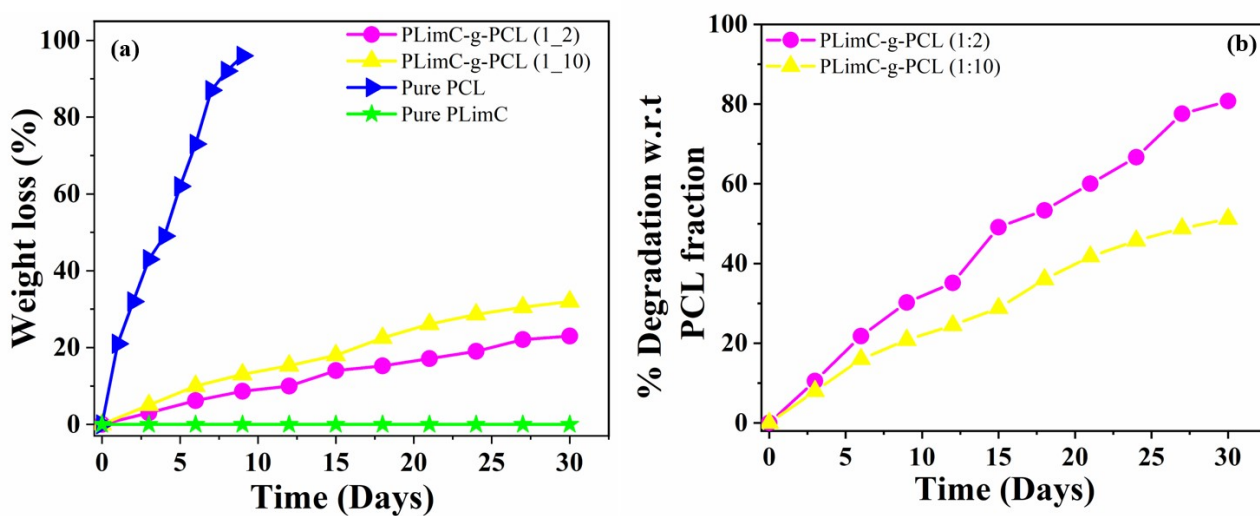

**Figure S8.** Enzymatic degradation of graft copolymers (a) PLimC-g-PCL films with Lipase ( $0.2 \text{ mg mL}^{-1}$ ) in phosphate-buffered solution ( $0.025\text{M}$ ,  $\text{pH} = 7.4$ ) and (b) percentage degradation with respect to PCL fraction in 30 days.

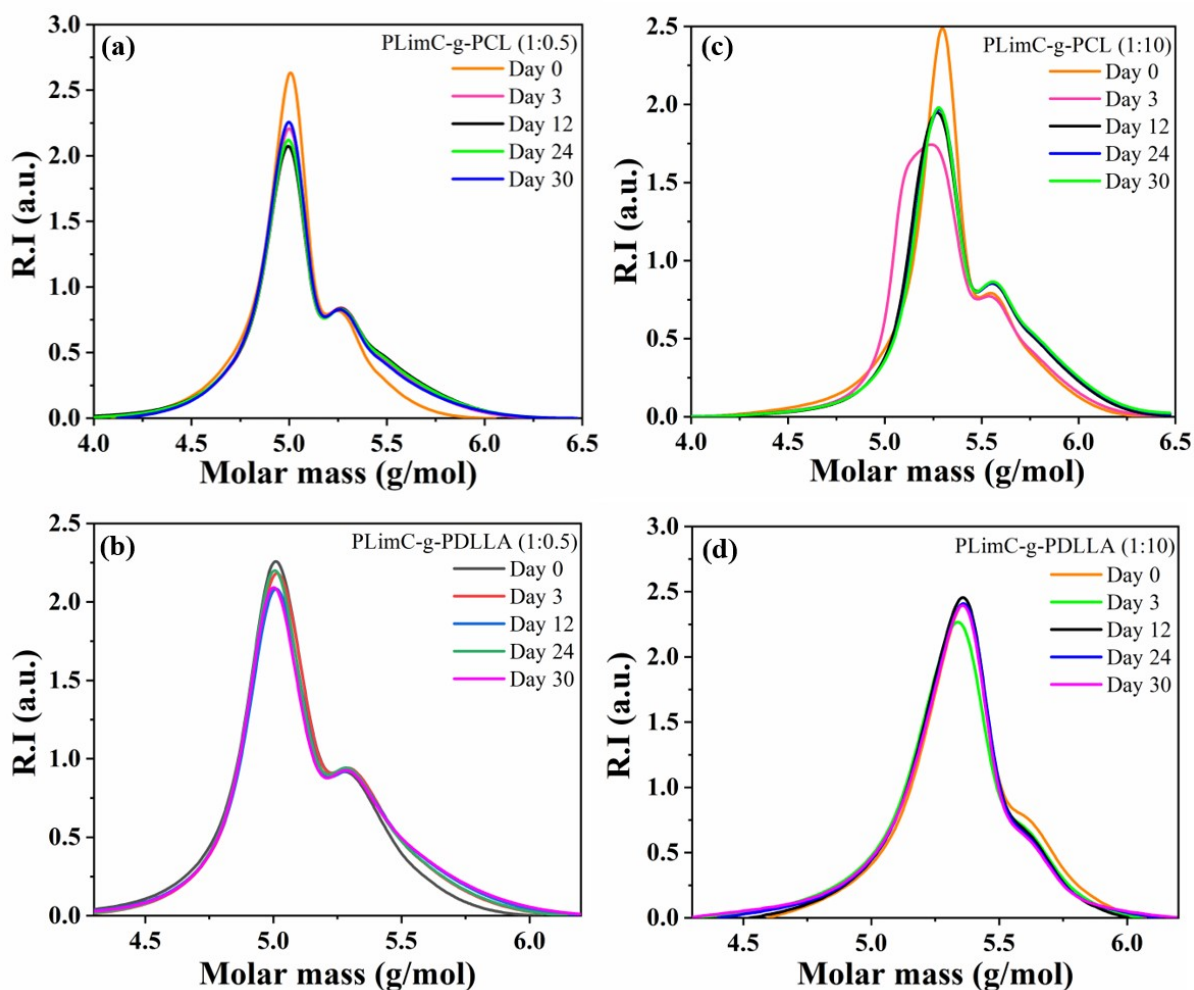

**Figure S9.** THF-GPC curves of graft copolymers (a) PLimC-g-PCL with 1:0.5 feed ratio (b) PLimC-g-PDLLA with 1:0.5 feed ratio (c) PLimC-g-PCL with 1:10 feed ratio and (d) PLimC-g-PDLLA with 1:10 feed ratio before and after enzymatic degradation.

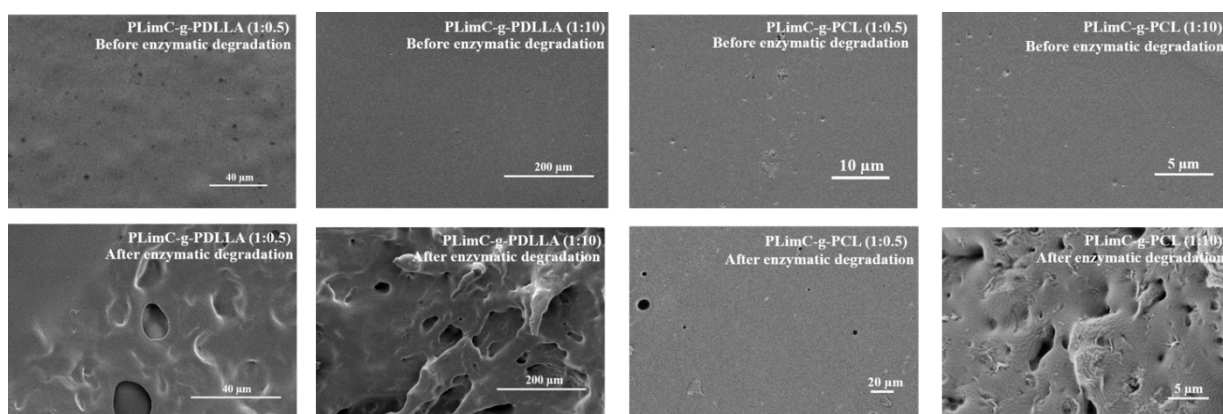

**Figure S10.** SEM images of PLimC-g-PDLLA and PLimC-g-PCL films before enzymatic degradation (1<sup>st</sup> row) and PLimC-g-PDLLA and PLimC-g-PCL films after enzymatic degradation (2<sup>nd</sup> row)

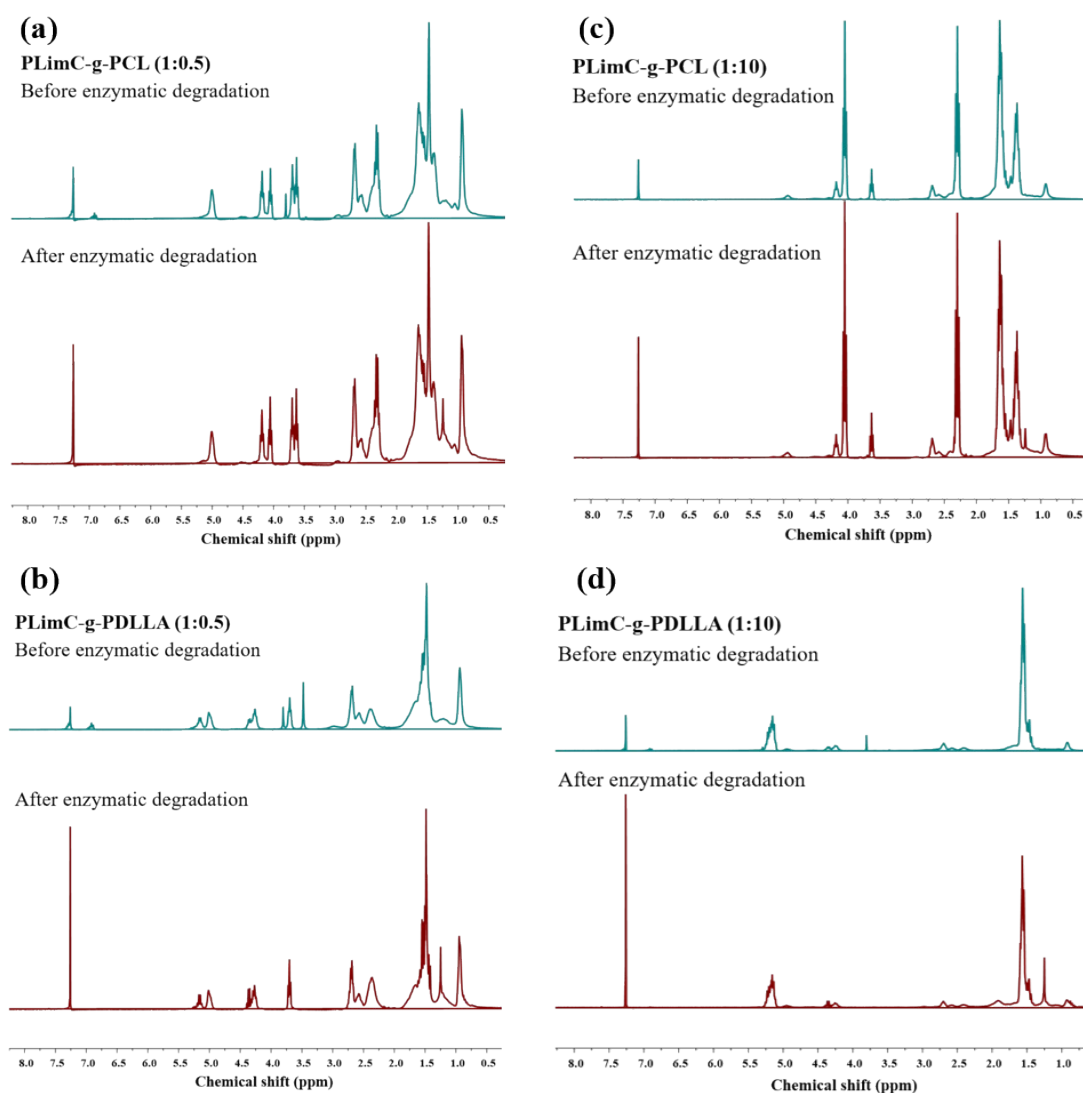

**Figure S11.**  $^1\text{H}$  NMR of the graft copolymers before and after enzymatic degradation **(a)** PLimC-g-PCL with 1:0.5 feed ratio **(b)** PLimC-g-PDLLA with 1:0.5 feed ratio **(c)** PLimC-g-PCL with 1:10 feed ratio and **(d)** PLimC-g-PDLLA with 1:10 feed ratio.
